# Supplementary material
Source: PubMed Central journal article supplement (PMC3491493)
Supplement: 1207718109_pnas.201207718SI.pdf [file 1207718109_pnas.201207718SI.pdf]

# Supporting Information

Kim et al. 10.1073/pnas.1207718109

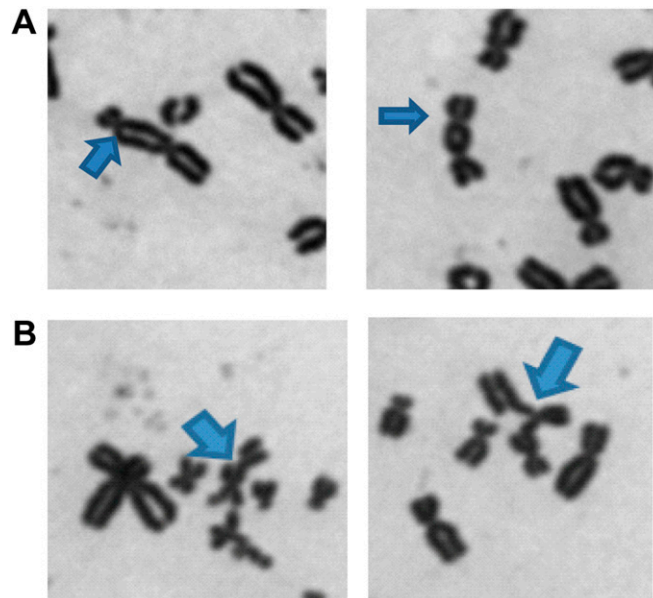

**Fig. S1.** BARD reduces chromosome aberrations after IR. (A) Sectorial metaphases showing G1-type chromosome aberrations, such as dicentrics, after 5 Gy of IR exposure. The arrows indicate dicentric metaphase. (B) Sectorial metaphases showing S- or G2-type chromosomal aberrations, such as tri- or quadriradials, after 4 Gy of IR exposure. The arrows indicate chromatid breaks and triradials. Magnification: 600 $\times$ .

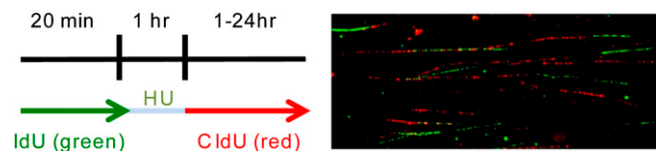

**Fig. S2.** Schematic of single DNA fiber analysis. Green tracts illustrate 5-iododeoxyuridine (IdU), and red tracts illustrate 5-chlorodeoxyuridine (CldU). An example image of DNA labeled with IdU and CldU is shown. Hydroxyurea (HU) does result in DNA double-strand breaks (DSBs) after stalled replication forks, which is close to the DSBs induced by other agents.

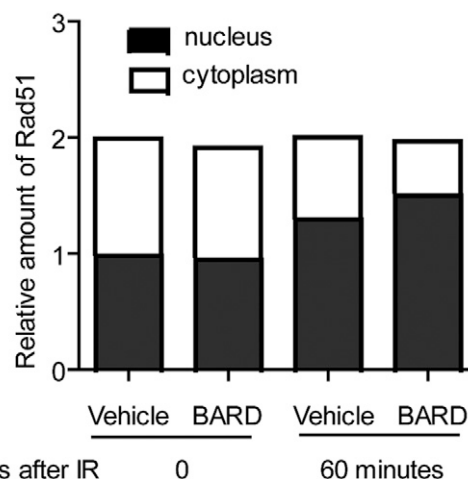

**Fig. S3.** Relative amount of Rad51 between the cytoplasm and nucleus. Rad51 protein levels in each fraction were normalized to unirradiated vehicle control. At 60 min after 5-Gy irradiation, nuclear localization of Rad51 is higher in bardoxolone methyl (BARD)-pretreated cells than in vehicle-pretreated control. There is no change in total Rad51 levels. qPCR, quantitative PCR.

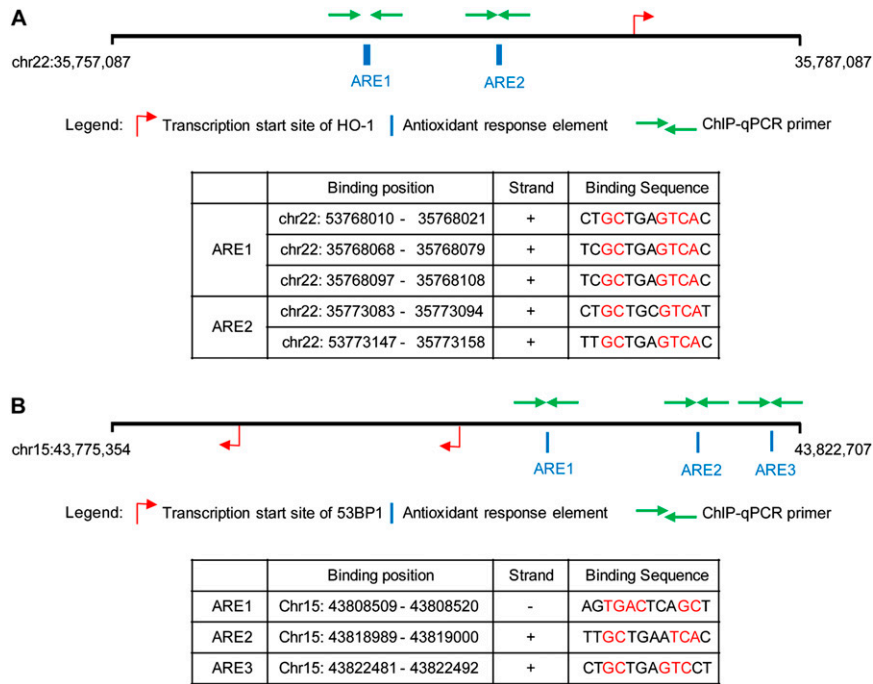

**Fig. 54.** Location of antioxidant response elements (AREs) in the promoter region of heme oxygenase-1 (HO-1) and p53 binding protein-1 (53BP1). Locations of nuclear factor-erythroid 2-related factor 2 (Nrf2) binding motifs are identified using search tools from SABiosciences in the promoter region of HO-1(A; chromosome 22) and 53BP1 (B; chromosome 15), including the direction of transcription (red arrow). "Core sequences" of AREs are marked in red. BARD, bardoxolone methyl.

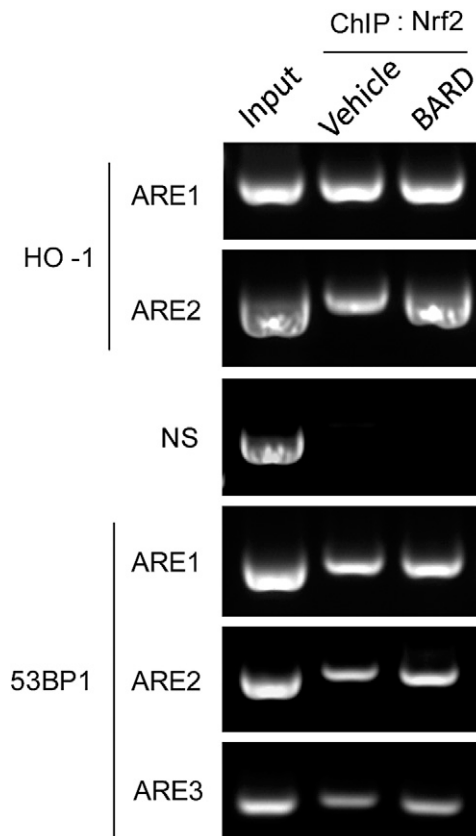

**Fig. 55.** Nuclear factor-erythroid 2-related factor 2 (Nrf2) binds to the p53 binding protein-1 (53BP1) promoter region harboring the antioxidant response elements (AREs) in human colonic epithelial cells (HCECs) after bardoxolone methyl (BARD) treatment. A ChIP assay was performed 18 h after vehicle or BARD treatment. Data shown are from a representative experiment.

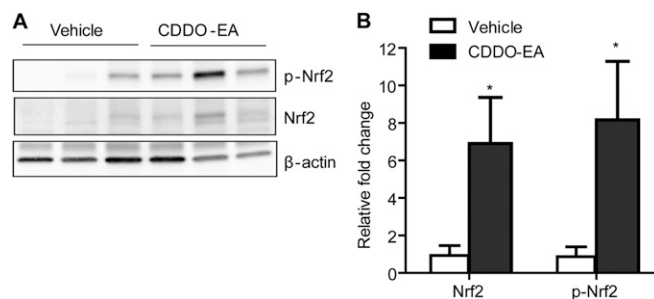

**Fig. S6.** 2-Cyano-3,12-dioxooleana-1,9 (11)-dien-28-oic acid (CDDO)-ethyl amide (EA) stabilizes Nuclear factor-erythroid 2-related factor 2 (Nrf2) and increases its phosphorylation in vivo. (A) Control or CDDO-EA diet was provided to unirradiated WT mice ( $n = 3$  per group) for 3 d, and colon tissues were then lysed. Total Nrf2 and phospho-Nrf2 (p-Nrf2) were detected by Western blot analysis. (B) Quantitative data show the average intensity of total Nrf2 and p-Nrf2 levels from Western blots. \* $P < 0.05$  in the unpaired Student  $t$  test ( $n = 3$ ).

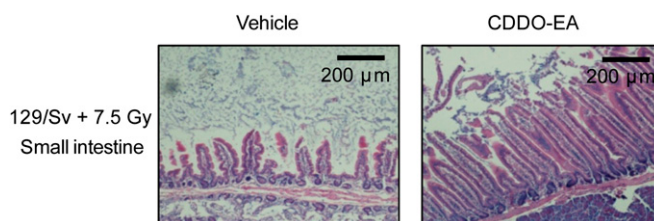

**Fig. S7.** 2-Cyano-3,12-dioxooleana-1,9 (11)-dien-28-oic acid (CDDO)-ethyl amide (EA) protects the small intestine from acute total body irradiation (TBI). Representative images of H&E staining of the small intestine in 129/Sv mice are shown at 5 d after TBI with or without prior feeding of CDDO-EA chow.

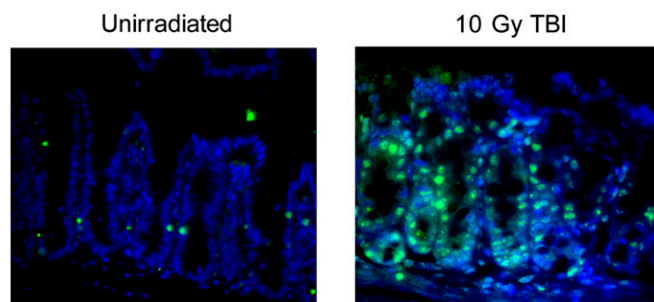

**Fig. S8.** Immunostaining of p53 binding protein-1 (53BP1) in mouse colon tissues. Representative images show 53BP1-positive cells (green) in colon tissues 3 d after 10-Gy doses of total body irradiation (TBI) exposure. DAPI was used for counterstaining (blue). Magnification: 400 $\times$ .

**Table S1. Calculation of dose-modifying factor from cell survival**

| Survival fraction | HCEC CT7 |      |      | HCEC CT7/shNrf2 |      |      |
|-------------------|----------|------|------|-----------------|------|------|
|                   | Dose, Gy |      |      | Dose, Gy        |      |      |
|                   | DMSO     | BARD | DMF  | DMSO            | BARD | DMF  |
| 1                 | 0        | 0    |      | 0               | 0    |      |
| 0.9               | 0.48     | 0.78 | 1.61 | 0.22            | 0.23 | 1.05 |
| 0.8               | 0.91     | 1.30 | 1.42 | 0.45            | 0.47 | 1.05 |
| 0.7               | 1.32     | 1.75 | 1.32 | 0.70            | 0.73 | 1.05 |
| 0.6               | 1.73     | 2.18 | 1.26 | 1.00            | 1.02 | 1.05 |
| 0.5               | 2.16     | 2.62 | 1.21 | 1.27            | 1.33 | 1.05 |

BARD, bardoxolone methyl; CT7, trisomy 7; DMF, dose-modifying factor; HCEC, human colonic epithelial cell; shNrf2, short hairpin nuclear factor-erythroid 2-related factor 2.

**Table S2. Primer sequence for ChIP-quantitative PCR**

|             |      | Forward primer                | Reverse primer              |
|-------------|------|-------------------------------|-----------------------------|
| HO-1        | ARE1 | 5'-CTGCCCAAACCACTTCTGTT-3'    | 5'-ATAAGAAGGCCTCGGTGGAT-3'  |
|             | ARE2 | 5'-CCCTGCTGAGTAATCCTTTCCGA-3' | 5'-ATGTCCCGACTCCAGACTCCA-3' |
| 53BP1       | ARE1 | 5'-CCGGATCTAAGCAAGGATTG-3'    | 5'-CAGTTTGCCAGCTCCTAAG-3'   |
|             | ARE2 | 5'-CTAGATGAGGGCCAGATGA-3'     | 5'-CTGAAGGAACCTTTGTCCA-3'   |
|             | ARE3 | 5'-GAATGTCCTGGTCCTGGCTA-3'    | 5'-TCTAAAGGAGCTGGGGGAGT-3'  |
| Nonspecific |      | 5'-GCTATGTGGGAGGTTGAGGA-3'    | 5'-CCATGGTCAGCAGTTTGCTA-3'  |

ARE, antioxidant response element; 53BP1, p53 binding protein-1; HO-1, heme oxygenase-1.
